# Supplementary material for: Prediction of emulsification behaviour of pea and faba bean protein concentrates and isolates from structure–functionality analysis
Source: PubMed Central journal article supplement — RSC Adv. 2021 Mar 25;11(20):12117–35. doi: 10.1039/d0ra09302e (PMC8696636; doi:10.1039/d0ra09302e), 2021-03-25
Supplement: RA-011-D0RA09302E-s001.pdf [file RA-011-D0RA09302E-s001.pdf]

### Supplementary data

#### Prediction of emulsification behaviour of various faba and pea protein commercial samples from structure-functionality analysis

Fatemeh Keivaninahr, Pravin Gadkari, Khaled Zoroufchi Benis, Mehmet Tulbek, Supratim Ghosh

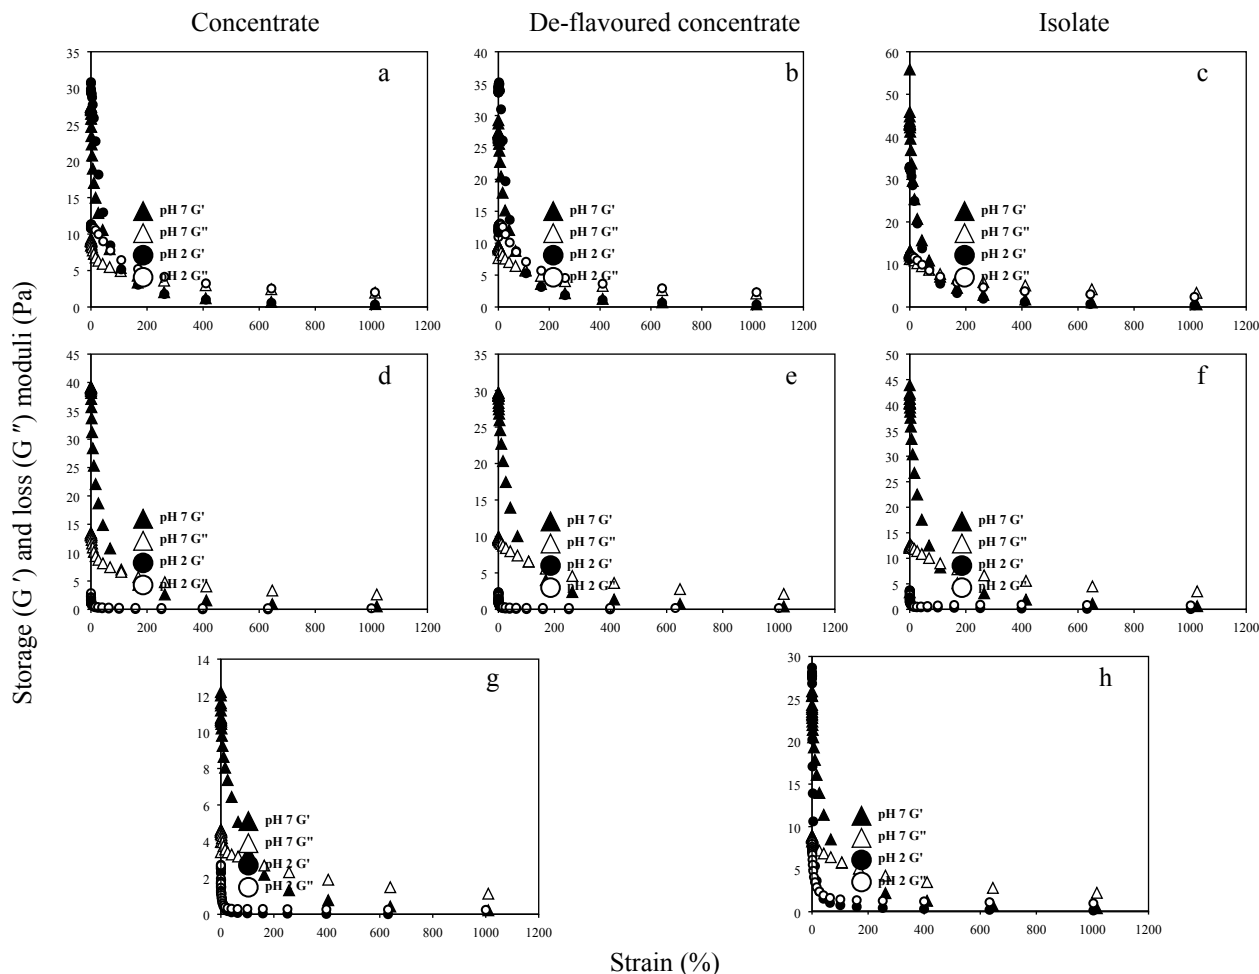

**Figure S1.** Strain-dependent storage ( $G'$ ) and loss ( $G''$ ) moduli of various emulsions stabilized by (a) FBP60, (b) DefFBP60, (c) FPI, (d) PP55, (e) DefPP55, (f) PPI, (g) WPI and (h) EWP at pH 2 and pH 7.

a)

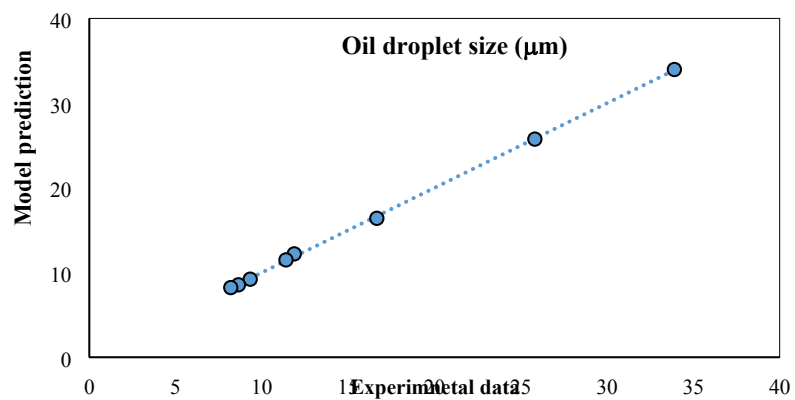

b)

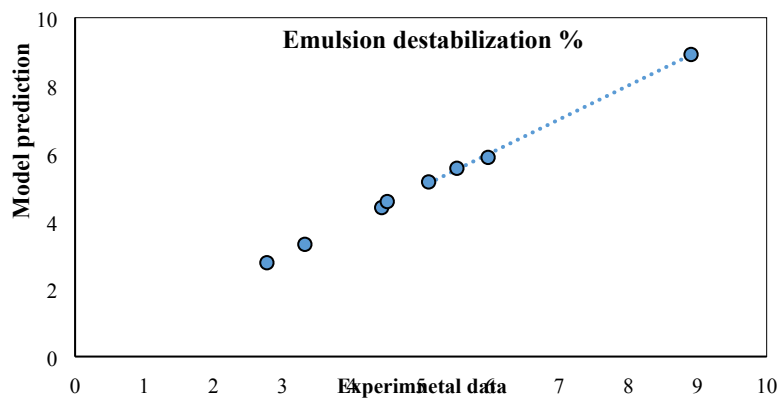

c)

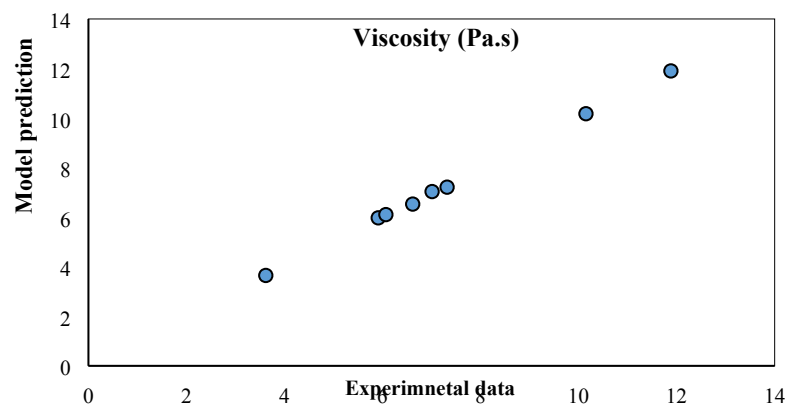

**Figure S2.** Comparison of the experimental and EPR model predicted values for emulsion (a) oil droplet size, (b) destabilization % and (c) viscosity.
